# Supplementary material for: Blastic plasmacytoid dendritic cell neoplasm: genomics mark epigenetic dysregulation as a primary therapeutic target
Source: PubMed Central journal article supplement — Haematologica. 2018 Oct 31;104(4):729–37. doi: 10.3324/haematol.2018.202093 (PMC6442957; doi:10.3324/haematol.2018.202093), 2019-04
Supplement: 2018.202093.SAPIENZA_SUPPL.pdf [file 2018.202093.SAPIENZA_SUPPL.pdf]

## Blastic plasmacytoid dendritic cell neoplasm: genomics mark epigenetic dysregulation as a primary therapeutic target

Maria Rosaria Sapienza,<sup>1\*</sup> Francesco Abate,<sup>2,3\*</sup> Federica Melle,<sup>4</sup> Stefania Orecchioni,<sup>5</sup> Fabio Fuligni,<sup>6</sup> Maryam Etebari,<sup>1</sup> Valentina Tabanelli,<sup>4</sup> Maria Antonella Laginestra,<sup>1</sup> Alessandro Pileri,<sup>7,8</sup> Giovanna Motta,<sup>4</sup> Maura Rossi,<sup>1</sup> Claudio Agostinelli,<sup>1</sup> Elena Sabattini,<sup>1</sup> Nicola Pimpinelli,<sup>8</sup> Mauro Truni,<sup>9</sup> Brunangelo Falini,<sup>10</sup> Lorenzo Cerroni,<sup>11</sup> Giovanna Tarlarico,<sup>5</sup> Rossana Piccioni,<sup>12</sup> Stefano Amente,<sup>13</sup> Valentina Indio,<sup>14</sup> Giuseppe Tarantino,<sup>14</sup> Francesco Brundu,<sup>2</sup> Marco Paulli,<sup>15</sup> Emilio Berti,<sup>16</sup> Fabio Facchetti,<sup>17</sup> Gaetano Ivan Dellino,<sup>12,18</sup> Francesco Bertolini,<sup>5</sup> Claudio Tripodo,<sup>19\*</sup> Raul Rabadan<sup>2,3\*</sup> and Stefano A. Pileri<sup>4†\*</sup>

<sup>1</sup>Hematopathology Unit, Department of Experimental, Diagnostic, and Specialty Medicine, S. Orsola-Malpighi Hospital, University of Bologna, Italy; <sup>2</sup>Department of Systems Biology, Columbia University College of Physicians and Surgeons, New York, NY, USA; <sup>3</sup>Department of Biomedical Informatics, Columbia University College of Physicians and Surgeons, New York, NY, USA; <sup>4</sup>Division of Haematopathology, European Institute of Oncology, Milan, Italy; <sup>5</sup>Laboratory of Hematology-Oncology, European Institute of Oncology, Milan, Italy; <sup>6</sup>Department of Genetics and Genome Biology, The Hospital for Sick Children, Toronto, ON, Canada; <sup>7</sup>Dermatology Unit, Department of Experimental, Diagnostic and Specialty Medicine, University of Bologna, Italy; <sup>8</sup>Division of Dermatology, Department of Surgery and Translational Medicine, University of Florence, Italy; <sup>9</sup>Pathological Anatomy Histology & Cytogenetics, Niguarda Cancer Center, Niguarda-Ca' Granda Hospital, Milan, Italy; <sup>10</sup>Institute of Hematology and Center for Hemato-Oncology Research (CREO), University and Hospital of Perugia, Italy; <sup>11</sup>Universitätsklinik für Dermatologie und Venerologie, LKH-Universitätsklinikum Graz, Austria; <sup>12</sup>Department of Experimental Oncology, European Institute of Oncology, Milan, Italy; <sup>13</sup>Department of Molecular Medicine and Medical Biotechnologies, University of Naples 'Federico II', Italy; <sup>14</sup>"Giorgio Prodi" Cancer Research Center, University of Bologna, Italy; <sup>15</sup>Unit of Anatomic Pathology, Department of Molecular Medicine, University of Pavia and Fondazione IRCCS San Matteo Policlinic, Pavia, Italy; <sup>16</sup>Department of Dermatology, Fondazione IRCCS Ca' Granda - Ospedale Maggiore Policlinic and Milan University, Milan, Italy; <sup>17</sup>Pathology Section, Department of Molecular and Translational Medicine, University of Brescia, Italy; <sup>18</sup>Department of Oncology and Hemato-Oncology, University of Milan, Italy and <sup>19</sup>Tumor Immunology Unit, Department of Health Science, Human Pathology Section, University of Palermo School of Medicine, Italy

\*MRS, FA, CT, RR and SAP contributed equally to this work. †Alma Mater Professor, Bologna University

©2019 Ferrara Storti Foundation. This is an open-access paper. doi:10.3324/haematol.2018.202093

Received: July 16, 2018.

Accepted: October 30, 2018.

Pre-published: October 31, 2018.

Correspondence: MARIA ROSARIA SAPIENZA

mariarosaria.sapienza@gmail.com

# **Supplementary Appendix**

## **Immunohistochemistry and cytogenetics**

Fourteen BPDCN cases were investigated and their clinical characteristics are reported in Table S1. All the skin biopsies at diagnosis were reviewed by a panel of at least three expert hematopathologists (CA, EB, FF, LC, MP, ES, CT, MT, and SAP) according to the WHO Classification criteria.<sup>1</sup> Immunohistochemistry (Dako Denmark) used the following antibodies: CD4,CD56, TdT (Novacastra) CD123 (BD Biosciences PharMingen), CD303/BDCA2 (Dendritics), TCL1 (Cell Marque), CD68PGM1, MPO, CD34, CD3, CD30 (Dako Denmark). If necessary, additional antibodies were evaluated accordingly to the specific requests of the single case (not reported). For the cytogenetic investigation of the BPDCN patients we used the whole exome sequencing data in order to map at highest resolution the chromosome 9 at cytoband p21 and evaluate the presence of the CDKN2A gene deletion in homo/heterozigosity; the most relevant alteration recognized by the WHO in the BPDCN context.

Immunohistochemistry and cytogenic characteristics are summarized in Table S2.

## **DNA sample extraction**

We used MagCore Genomic DNA Tissue Kit (RBC Bioscience Corp, Taiwan) for DNA extraction from cryopreserved tumoral skin biopsies, Oragene DNA kit (DNA Genotek Inc., ON, Canada) for DNA from saliva samples and MagCore Cultured Cells DNAKit (RBC Bioscience Corp, Taiwan) for DNA extraction from the CAL-1 cell line. All the samples were then loaded on the semi-automatic MagCore nucleic acid extractor (RBC Bioscience Corp, Taiwan). DNA quantity was evaluated by the Quant-iT PicoGreen dsDNA Assay Kit (Invitrogen Life technologies, UK) and all the samples passed the quality check.

Informed consent was obtained from each patient in accordance with the guidelines of the Institutional Review Board of the Department of Experimental, Diagnostic, and Specialty Medicine of the University of Bologna and the Declaration of Helsinki.

## **Sanger Sequencing**

We validated by conventional Sanger sequencing two candidate nonsense somatic mutations of SUZ12 and ASXL1 occurring in the patients BPDCN\_38 and BPDCN\_39, respectively, as reported by WES analysis (Figure S1). We sequenced both tumor and normal DNA. The following PCR primers were custom-designed using Primer3 on line software (<http://bioinfo.ut.ee/primer3-0.4.0/primer3/>):

ASXL1-Forward-GGACTCACAGATGGGCTAGG;

ASXL1-Reverse-AGAATGGGACCATTGTCTGC;

SUZ12-Forward TCATGCCTGTATGCTGTTTG;

SUZ12-Reverse- GAAGCAGATTCCCCCTTTTC.

The PCR products were sequenced both forward and reverse with ABI PRISM BigDye Terminator Cycle Sequencing Ready Reaction kit (Version 3) and loaded on ABI PRISM 3100-Avant Genetic Analyzer (Applied Biosystems, Foster City, CA, USA), according to manufacturer's instructions. Tumor sequences were compared with the corresponding germline sequences using FinchTV version 1.4 software (Geospiza Inc., Seattle City, WA, USA).

# Libraries Preparation

## **Whole Exome Sequencing (WES) libraries**

We performed paired-end sequencing of matched tumor/normal DNA samples (9 cases), tumor only DNA samples (5 cases), and the CAL-1 cell line (Table S3). Whole exome sequencing libraries were prepared by using the TruSeq Exome Kit (Illumina, San Diego, CA, USA) and Nextera Rapid Capture Exome kit (Illumina, San Diego, CA, USA). According to the kit instructions the genomic DNA of each patient was fragmented to provide DNA fragments with a base pair peak at 350 bp, ligated at the both ends with specific adapters and then purified by Agencourt AMPure XP beads (Beckman Coulter, Brea, CA, USA). The DNA was then amplified by ligation-mediated PCR, purified, and hybridized. Hybridized fragments bounded to strepavidin beads whereas non-hybridized fragments were washed out. Captured DNA library amplification products were assessed for quality by Agilent 7500 DNA assay (Agilent, Santa Clara, CA, USA) and quantified by Quant-iT PicoGreen dsDNA Assay Kit (Invitrogen Life technologies, UK), according to the manufacturer's protocol. Each captured library was subjected to cluster generation on cBot instrument (Illumina, Inc., San Diego, CA, USA) and finally paired-end sequencing was performed on the Illumina HiScan SQ platform (Illumina, San Diego, CA, USA) to generate 100 bp paired-end reads ( $2 \times 100\text{PE}$ ). All the libraries passed the quality check.

### **Targeted sequencing libraries**

We performed targeted sequencing of the 14 BPDCN tumor samples, 7 normal matched saliva samples, and the CAL-1 cell line (Supplemental Material, Table S4).

To validate the WES results we used the MiSeq TruSeq Custom Amplicon (Illumina, Inc., San Diego, CA, USA) a highly multiplexed targeted sequencing assay planned with DesignStudio, an online software, available at Illumina website. We developed a custom amplicon panel to specifically interrogate 9 genes (Table S5). We used the TruSeq Custom Amplicon Kit with 250 ng of DNA per sample and the amplicon libraries were loaded on MiSeq instrument (Illumina, Inc., San Diego, CA, USA) to generate  $2 \times 151$ -bp paired reads, according to the manufacturer's instructions. All libraries passed the quality check and the MiSeq targeted sequencing approach allowed us to reach a median coverage depth of 647X, a mean coverage depth of 1600X (ranging from 98X to 4056X).

### **RNA sequencing libraries**

We performed RNA sequencing of 9 BPDCN samples – 5 cases belonging to the discovery set and 4 cases belonging to the extended set (Table S6). Total RNA from the nine biopsies was extracted using TRIzol reagent (Invitrogen). Paired-end libraries (2x75 base pair) were prepared according to the TruSeq RNA sample preparation v2 protocol (Illumina, San Diego, USA). Briefly, 2  $\mu$ g of Poly(A)+ RNA were purified from total RNA using poly-T oligo attached magnetic beads and then used for fragmentation into 130–290 bp fragments. First strand of cDNA synthesis was performed using reverse transcriptase enzyme (SuperScript II, Invitrogen, Life Technologies, USA) and random hexamer primer, followed by generation of double-stranded cDNA. AmpureXP beads (Beckman Coulter, Brea CA) were used to purify the ds cDNA and an End Repair step was

performed to convert the overhangs, resulting from fragmentation, into blunt ends by 3' to 5' exonuclease activity. A single "A" nucleotide was added to the 3' ends of the blunt fragments to prevent them from ligating to one another during the adapter ligation reaction. This approach was adopted to ensure a low rate of chimera (concatenated template) formation. Subsequently, sequencing adapters were added to the ends of the ds cDNA fragment and a PCR reaction was used to selectively enrich those ds cDNA fragments that had adapter molecules on both ends, amplifying the amount of ds cDNA in the final libraries. Lastly, PCR library products were purified by AmpureXP beads and quality control analysis was assessed using a DNA-1000 (Agilent, USA). The quantification was performed by the Quant-it PicoGreen dsDNA Assay Kit per manufacturer's protocol (Invitrogen, Life Technologies, USA). The resulting libraries were sequenced on an Illumina HiScan SQ (Illumina, San Diego, USA) following the manufacturer's instructions.

### **Pathology tissue-chromatin immunoprecipitation (PAT-ChIP) sequencing libraries**

PAT-ChIP experiments were performed as in Fanelli *et al*<sup>2</sup> with the following modification: sonication for chromatin extraction was performed in 400 ml. Antibodies used were: anti-Histone H3acetylK27 (ab472) and anti-trimethyl-Histone H3K27 (07-449). Immunoprecipitated DNA was purified with QIAGEN columns and, after library preparation, sequenced with a HiSeq2000 in multiplexed run to obtain 50 bp single-end reads following manufacturer protocols.

# Bioinformatic Analysis of Sequencing Data

## Whole exome sequencing analysis

Illumina HiScanSQ analysis produced an average of 70 million paired-end reads per sample. Average coverage breadth, defined as the percentage of the captured coding sequence of a haploid reference covered by reads, was 98% (92% at 20x, 72% at 50x). We computed breadth of coverage using cnvkit (version 0.9.0)<sup>3</sup>, pysam (version 0.12.0.1) and samtools (version 1.6).<sup>4</sup> Paired-end reads were mapped to the hg19 reference genome using the Burrows-Wheeler Aligner (BWA version 0.5.9)<sup>5</sup> alignment tool. We detected variants as sites that differed from the reference in each sample independently. To assess statistical significance of variant calling we used the SAVI algorithm (Statistical Algorithm for Variant Identification) developed at Columbia University.<sup>6</sup> Briefly, SAVI constructs empirical priors for the distribution of variant frequencies for each sample. High-credibility intervals (posterior probability  $\geq 1-10^{-5}$ ) are constructed for the corresponding change in frequency between tumor and normal samples. A discrete set of frequencies will be the base for constructing prior and posterior distribution and posterior probability is connected to the prior by a modified binomial likelihood. Variant with total depth in tumor and normal lower than 10x were filtered. Then, we first selected somatic variant with frequency greater than 10% in tumor samples and less than 3% in normal samples. In samples without a matched normal control we selected variants with depth greater than 20x and frequency greater than 25%. To remove systematic errors, we created an internal



database with all the variants present in normal samples, and excluded all variants that were found to be present in any of the normal samples. WES results were validated by MiSeq (Table S7).

### *Functional Enrichment Analysis*

To perform the functional mutation enrichment analysis, we selected only genes affected by deleterious SNVs (nonsense or frameshift) and/or recurrently mutated in  $\geq 3$  samples, for a total of 54 genes. We analyzed the selected gene list by WebGestalt toolkit<sup>7</sup>, using the Overrepresentation Enrichment Analysis (ORA) method and the Gene Ontology/Biological Process functional database. In Table S8 the top 10 most significant biological processes emerged from the analysis.

WES analysis recognized several deleterious mutations of *ASXL1* and *TET2* genes (Table S9). Overall, 25 epigenetic modifier genes were found mutated (Table S10).

### *Copy Number Analysis*

We obtained copy number variation calls using cnvkit (version 0.9.0)<sup>3</sup>. Where possible, default parameters were used. We used GRCh37.75 human genome as reference. Starting from this reference, we built 10 kbases anti-target regions (as required by cnvkit). Then, we computed copy ratio, splitting the normal samples with respect to their exome sequencing preparation kit. The two normal reference copy number profiles were then used to estimate the copy ratio for the tumor samples (Figure S2 and S3). Finally, the copy ratios for each sample were discretized into absolute copy number calls using the “call” command of the cnvkit suite. Tumor purity (100% for the cell line, and 90% for the other samples) was the single

parameter of the “call” step. For each sample and computation, we used the appropriate bedfile provided by each exome sequencing preparation kit: Nextera rapid capture exome kit (v1.2) and TruSeq Exome Kit (2012).

### **Targeted sequencing analysis**

Reads were aligned to the UCSC hg19 reference genome using BWA-MEM.<sup>5</sup> Aligned reads were analyzed using the SAVI algorithm<sup>6</sup>, and variants were selected based on coverage depth and frequency. Specifically, SAVI constructed empirical priors for the distribution of variant frequencies in each sample, from which we obtained a corresponding high-credibility interval for the frequency of a particular allele. To obtain estimates for alleles with frequencies as low as 0.5%, we chose logarithmically spaced precision for the priors and posteriors. Furthermore, we considered variants detected in the normal samples and absent in the tumor as false positive calls and determined that alleles with lower bound interval of posterior probability less than 0.5 produced a false discovery rate < 3%.

### **RNA sequencing analysis**

We mapped 9 BPDCN samples – 5 cases belonging to the discovery set and 4 cases belonging to the extended set- by means of STAR aligner (version 2.4.0)<sup>8</sup> on human reference genome hg19 and obtained an average of 70 million paired-end mapped reads per sample. Differential expression analysis and mRNA quantification was performed by means of DeSeq.<sup>9</sup>

Gene set enrichment analysis was separately performed on the discovery, extended set and CAL-1 cell line by means of GSEA software and Molecular Signature Database (MSigDB)<sup>10</sup> on the previously ranked gene list based on regularized base-2 DeSeq logarithm transformation (Figure S4 and S5).

#### *Integration of RNA and PAT-ChIP sequencing*

We recognized 86 genes up-regulated and also marked by H3K27acetylation. The Gene ontology Analysis was conducted on the 86 genes by WebGestalt toolkit,<sup>7</sup> using the Overrepresentation Enrichment Analysis (ORA) method and the Gene Ontology/Biological Process functional database. In Table S11 the top 10 most enriched biological processes emerged from the analysis.

#### **Pathology tissue-chromatin immunoprecipitation (PAT-ChIP) sequencing analysis**

PAT-Chip FASTQ files were quality checked and filtered with NGS QC Toolkit (version 2.3.3) using default parameters. Alignments were performed with Burrows-Wheeler Aligner (version 0.7.10)<sup>5</sup> to hg18 using default parameters. SAMtools (version 1.2) and BEDtools (version 2.24) were used for filtering steps and file formats conversion. Duplicate reads were discarded and peaks were identified from uniquely mapping reads, using MACS (version 2.1.0)<sup>11</sup> callpeak with default parameters and -broad, -SPMR, -shiftsize 73 options. The q-value cutoff used to call significant regions was 0.05. UCSC tools and genome browser was used for data visualization.

ChIP-seq signals of peaks called by MACS were subjected to unbiased clustering, using the seqMINER 1.3.2 platform.<sup>12</sup> Linear Kmeans was used for clustering, with the following parameters: left and right extension = 5 kb, internal bins (with respect to the peaks) = 160, number of cluster = 25. seqMINER was also used to generate the heatmaps and the average profiles of read density for the different clusters.

### **Mouse Model**

Experiments were carried out on nonobese diabetic severe combined immunodeficient NOD/SCID interleukin-2 receptor  $\gamma$  (IL-2R $\gamma$ )-null (NSG) mice, 6 to 8 weeks old. NSG mice were bred and housed under pathogen-free conditions in the animal facilities at the European Institute of Oncology–Italian Foundation for Cancer Research (FIRC) Institute of Molecular Oncology (IEO-IFOM, Milan, Italy) as previously reported.<sup>13</sup> All animal experiments were carried out in accordance with the applicable Italian laws (D.L.vo 26/14 and following amendments) and the institutional guidelines. All *in vivo* studies were ratified by the Italian Ministry of Health. For induction of BPDCN in mice, 5.000 CAL-1 cells were injected intravenously (i.v.) through the lateral tail vein in non-irradiated mice. Human engraftment was defined by means of percentage of human cells in peripheral blood from tail vein of the recipient animals.

Human cell engraftment in the peripheral blood, bone marrow of the femur and of the spine, spleen and liver was investigated by flow cytometry and immunohistochemistry from 39 days after transplant onward in a representative mouse vehicle-treated. The phenotype of human cells in NSG mice was evaluated by flow cytometry using the following anti-human antibodies: anti-CD38-APC (clone LS198-4-3), -CD45-APC-Cy7 (clone J33), -CD56-PE (clone N901) from Beckman-Coulter and anti-mouse CD45-FITC (clone 30-F11) from Becton Dickinson (BD) to exclude murine cell contamination from the analysis. After red cell lysis, cell suspensions were evaluated by a FACSCalibur (BD) using analysis gates designed to

exclude dead cells, platelets and debris. Percentages of stained cells were determined and compared to appropriate negative controls. Seven-aminoactinomycin D (7AAD; Sigma-Aldrich) was used to enumerate viable, apoptotic and dead cells. Hematoxylin and eosin (H&E) staining was performed on the bone marrow and spleen of transplanted mice vehicle-treated after 39 days. Immunohistochemistry was performed on samples obtained from the spine of transplanted mice vehicle-treated after 39 days by using an anti-BDCA2/CD303 antibody (Dendritics, Lyon, France; Clone 124B3; dilution: 1:20).

### **In vivo treatments**

Bortezomib, 5'-Azacytidine, Decitabine provided by Sigma-Aldrich (Sigma-Aldrich Corporation, St. Louis, MO, USA) and Romidepsin provided by Santa Cruz (Santa Cruz Biotechnology, Santa Cruz, CA), were dissolved in saline (0.9% w/v NaCl) and injected intraperitoneally into the mice: Bortezomib was administrated at 0.5 mg/kg two times weekly for 4 weeks, 5'-Azacytidine 5 mg/kg 5 doses (2-day intervals), Decitabine 2.5 mg/kg 3 doses (2-day intervals) and Romidepsin 0.5 mg/kg every day for 4 weeks. Drug dosages were previously defined as non-toxic in mice not injected with CAL-1. Administration started one day after CAL-1 cells injection. Mice were monitored for survival daily until reaching humane end-points. The log-rank test was used to compare survival between different groups. All experiments were carried out in duplicate, a total of 110 animals having been treated.

**Table S1. Patients clinical characteristics**

| <b>Sample</b> | <b>Sex</b> | <b>Age (Y)</b> | <b>Tissue</b> | <b>Other sites</b> | <b>F. Up</b> | <b>(mo)</b> | <b>Main Therapy</b> | <b>Transplant</b> |
|---------------|------------|----------------|---------------|--------------------|--------------|-------------|---------------------|-------------------|
| BPDCN_40      | F          | 9              | Skin          | BM                 | DOD          | 71.5        | AIEOP AML 2002/HR   | Auto-SCT          |
| BPDCN_39      | M          | 89             | Skin          | NA                 | LOST         | NA          | NA                  | NA                |
| BPDCN_23      | M          | 19             | Skin          | //                 | DOD          | 76          | CHOP + MTX          | Allo-SCT          |
| BPDCN_43      | M          | 67             | Skin          | BM, LN             | DOD          | 6.3         | GIFOX               | NO                |
| BPDCN_25      | M          | 62             | Skin          | BM, PB, LN         | ADF          | 21          | Hyper-CVAD          | NO                |
| BPDCN_45      | F          | 66             | Skin          | LN                 | DOD          | 36          | Hyper-CVAD          | Auto-SCT          |
| BPDCN_46      | M          | 29             | Skin          | PH                 | ADF          | 57          | Hyper-CVAD          | Auto-SCT          |
| BPDCN_41      | M          | 60             | Skin          | //                 | DOD          | 41.3        | ICE                 | Auto + Allo-SCT   |
| BPDCN_47      | M          | 78             | Skin          | //                 | ADF          | 74          | Local RT            | NO                |
| BPDCN_49      | F          | 49             | Skin          | //                 | DOD          | 28          | Local RT            | NO                |
| BPDCN_42      | F          | 73             | Skin          | BM, PB, LN, PL     | DOD          | 7.6         | MICE                | NO                |
| BPDCN_37      | M          | 75             | Skin          | NA                 | DOD          | 9           | NA                  | NA                |
| BPDCN_38      | M          | 69             | Skin          | BM                 | DOD          | 6.4         | NILG AML 02/06      | Allo-SCT          |
| BPDCN_50      | M          | 37             | Skin          | LN                 | LOST         | NA          | NA                  | NA                |

Abbreviations: BPDCN, blastic plasmacytoid dendritic cell neoplasm; y, years; mo, months; M, male; F, female; BM, bone marrow; LN, lymph node, PB, peripheral blood; PH, pharynx; PL, pleura; DOD, died of disease; AWD, alive with disease; ADF, alive disease free; LOST, lost at follow-up; NA, not available. AIEOP AML 2002/HR, Associazione Italiana di Ematologia e Oncologia Pediatrica acute myeloid leukemia high-risk children 2002/01 trial; CHOP, cyclophosphamide, doxorubicin, vincristine, prednisone; CHOP+MTX, cyclical chemotherapy with high-dose methotrexate and CHOP; GIFOX, gemcitabine, ifosfamide, and oxaliplatin; Hyper-CVAD, alternate cycles of hyper-fractionated cyclophosphamide, vincristine, doxorubicin, dexamethasone, and methotrexate and cytarabine; ICE, idarubicin, cytarabine, etoposide; RT, radiotherapy; MICE, mitoxantrone, cytarabine, etoposide; NILG AML 02/06, Northern Italy Leukemia Group acute myeloid leukemia 02/06 trial; Auto-SCT, autologous stem cell transplant; Allo-SCT, allogenic stem cell transplant.

**Table S2 . Patients immunohistochemical and cytogenetic characteristics**

| Case No  | CD3   | CD4   | CD30 | CD34  | CD56  | CD68PGM1 | CD123 | CD303/BDCA2 | TCL1  | MPO | TdT   | DEL_CDKN2A<br>Y/N |
|----------|-------|-------|------|-------|-------|----------|-------|-------------|-------|-----|-------|-------------------|
| BPDCN_23 | (-)   | (+)   | (-)  | (-)   | (+)   | (+ -)    | (+)   | (+)         | (+)   | (-) | (-)   | Y homozygosity    |
| BPDCN_25 | na    | (+)   | na   | (-)   | (+)   | (+ -)    | (+)   | (+)         | (+)   | (-) | (-)   | Y heterozygosity  |
| BPDCN_37 | (-)   | (+)   | na   | na    | (+)   | (- +)    | (+)   | na          | na    | (-) | (-)   | N                 |
| BPDCN_38 | (-)   | (+)   | na   | (-)   | (+ -) | (- +)    | (+)   | (+)         | (+)   | (-) | na    | Y heterozygosity  |
| BPDCN_39 | (-)   | (+ -) | (-)  | (-)   | (+)   | (- +)    | (+)   | (+)         | na    | na  | (-)   | Y heterozygosity  |
| BPDCN_40 | na    | (- +) | na   | (-)   | (+)   | na       | (+)   | (+)         | (- +) | na  | (+ -) | N                 |
| BPDCN_41 | (-)   | (+)   | (-)  | (- +) | (+ -) | (- +)    | (+)   | (+)         | (+ -) | (-) | (-)   | N                 |
| BPDCN_42 | na    | (+)   | na   | na    | (+)   | na       | (-)   | (+)         | na    | na  | na    | Y homozygosity    |
| BPDCN_43 | (- +) | (-)   | (-)  | (-)   | (+)   | na       | (+)   | (+)         | na    | (-) | (-)   | N                 |
| BPDCN_45 | (-)   | (- +) | na   | (-)   | (+ -) | (- +)    | (+ -) | (+)         | (+)   | (-) | (-)   | N                 |
| BPDCN_46 | (-)   | (+)   | (-)  | (- +) | (+)   | (- +)    | (+)   | na          | (-)   | na  | na    | Y heterozygosity  |
| BPDCN_47 | (-)   | (+ -) | (-)  | (-)   | (+)   | (+ -)    | (+)   | (+)         | (+ -) | (-) | (-)   | N                 |
| BPDCN_49 | (-)   | (+)   | (-)  | (-)   | (+)   | (-/ +)   | (+)   | na          | na    | (-) | (-)   | Y heterozygosity  |
| BPDCN_50 | (-)   | (+)   | na   | (-)   | (+)   | (-/ +)   | (+)   | (-)         | na    | (-) | (-)   | Y homozygosity    |

Abbreviations: BPDCN, blastic plasmacytoid dendritic cell neoplasm; (+), positive > 75% cells ; (+ -), positive 50-75% cells; (- +), positive 25-50%; (-), negative, no cell; DEL, deletion.

**Table S3. BPDCN samples sequenced by Whole-Exome Sequencing.**

| <b>Sample</b> | <b>Wes</b> | <b>Tumor cells %</b> |
|---------------|------------|----------------------|
| BPDCN_37      | Matched    | ≥90%                 |
| BPDCN_38      | Matched    | ≥90%                 |
| BPDCN_39      | Matched    | ≥90%                 |
| BPDCN_40      | Matched    | ≥90%                 |
| BPDCN_43      | Matched    | ≥90%                 |
| BPDCN_45      | Matched    | ≥90%                 |
| BPDCN_46      | Matched    | ≥90%                 |
| BPDCN_47      | Matched    | ≥90%                 |
| BPDCN_49      | Matched    | ≥90%                 |
| BPDCN_23      | Unmatched  | ≥90%                 |
| BPDCN_25      | Unmatched  | ≥90%                 |
| BPDCN_41      | Unmatched  | ≥90%                 |
| BPDCN_42      | Unmatched  | ≥90%                 |
| BPDCN_50      | Unmatched  | ≥90%                 |
| CAL-1         | Unmatched  | 100%                 |

Abbreviations: BPDCN, blastic plasmacytoid dendritic cell neoplasm; CAL-1, blastic plasmacytoid dendritic cell line



**Table S4. BPDCN samples sequenced by MiSeq targeted sequencing.**

| <b>Sample</b> | <b>MiSeq</b> | <b>Tumor cells %</b> |
|---------------|--------------|----------------------|
| BPDCN_37      | matched      | ≥90%                 |
| BPDCN_39      | matched      | ≥90%                 |
| BPDCN_40      | matched      | ≥90%                 |
| BPDCN_43      | matched      | ≥90%                 |
| BPDCN_45      | matched      | ≥90%                 |
| BPDCN_46      | matched      | ≥90%                 |
| BPDCN_49      | matched      | ≥90%                 |
| BPDCN_23      | unmatched    | ≥90%                 |
| BPDCN_25      | unmatched    | ≥90%                 |
| BPDCN_38      | unmatched    | ≥90%                 |
| BPDCN_41      | unmatched    | ≥90%                 |
| BPDCN_42      | unmatched    | ≥90%                 |
| BPDCN_47      | unmatched    | ≥90%                 |
| BPDCN_50      | unmatched    | ≥90%                 |
| CAL-1         | unmatched    | 100%                 |

Abbreviations: BPDCN, blastic plasmacytoid dendritic cell neoplasm; CAL-1, blastic plasmacytoid dendritic cell line

**Table S5. The genes investigated by MiSeq targeted sequencing.**

| <b>Genes</b>     | <b>Regions selected for Miseq panel</b> |
|------------------|-----------------------------------------|
| <i>IDH2</i>      | Hot spot region (Ex 4)                  |
| <i>KRAS</i>      | Hot spot region (Ex 2, 3)               |
| <i>BRAF</i>      | Hot spot region (Ex 11, 15)             |
| <i>ZRSR2</i>     | All coding Exons                        |
| <i>TET2</i>      | All coding Exons                        |
| <i>TNFRSF13B</i> | All coding Exons                        |
| <i>ASXL1</i>     | All coding Exons                        |
| <i>SUZ12</i>     | All coding Exons                        |
| <i>NRAS</i>      | Only Exon 2                             |

**Table S6. Samples analyzed by RNA sequencing.**

| <b>Sample</b> | <b>WES</b> | <b>Set</b>    | <b>Tumor cells %</b> |
|---------------|------------|---------------|----------------------|
| BPDCN_21      | N          | Extension Set | ≥90%                 |
| BPDCN_20      | N          | Extension Set | ≥90%                 |
| BPDCN_22      | N          | Extension Set | ≥90%                 |
| BPDCN_24      | N          | Extension Set | ≥90%                 |
| BPDCN_23      | Y          | Discovery Set | ≥90%                 |
| BPDCN_25      | Y          | Discovery Set | ≥90%                 |
| BPDCN_37      | Y          | Discovery Set | ≥90%                 |
| BPDCN_42      | Y          | Discovery Set | ≥90%                 |
| BPDCN_43      | Y          | Discovery Set | ≥90%                 |
| pDC_1         | N          | Both          | //                   |
| pDC_2         | N          | Both          | //                   |
| pDC_3         | N          | Both          | //                   |
| pDC_4         | N          | Both          | //                   |

Abbreviations: BPDCN, blastic plasmacytoid dendritic cell neoplasm; pDC, plasmacytoid dendritic cells; samples already sequenced by WES Y, yes; N, no.

**Table S7. MiSeq targeted sequencing validation results.**

| Cases       | Frequency % | ref/var | Gene             | CCDS                   | AA     | Validation MiSeq Y/N |
|-------------|-------------|---------|------------------|------------------------|--------|----------------------|
| BPDCN_25    | 28          | -/G     | <i>ASXL1</i>     | CCDS13201.1            | G642+  | Y                    |
| BPDCN_38    | 55          | G/T     | <i>ASXL1</i>     | CCDS13201.1            | G710*  | Y                    |
| BPDCN_39    | 36          | T/A     | <i>ASXL1</i>     | CCDS13201.1            | L775*  | Y                    |
| BPDCN_49    | 10          | C/T     | <i>ASXL1</i>     | CCDS13201.1            | R965*  | Y                    |
| BPDCN_47    | 49          | A/G     | <i>ASXL1</i>     | CCDS13201.1            | N986S  | Y                    |
| BPDCN_41    | 41          | -/A     | <i>TET2</i>      | CCDS47120.1,CCDS3666.1 | S657+  | Y                    |
| BPDCN_42    | 27          | C/T     | <i>TET2</i>      | CCDS47120.1,CCDS3666.1 | Q770*  | Y                    |
| BPDCN_38    | 33          | G/A     | <i>TET2</i>      | CCDS47120.1,CCDS3666.1 | W1003* | Y                    |
| BPDCN_43    | 51          | -/A     | <i>TET2</i>      | CCDS47120.1,CCDS3666.1 | Q1084+ | Y                    |
| BPDCN_42    | 41          | C/T     | <i>TET2</i>      | CCDS47120.1            | Q1466* | Y                    |
| BPDCN_37    | 80          | C/T     | <i>TET2</i>      | CCDS47120.1            | R1516* | Y                    |
| BPDCN_42    | 33          | C/G     | <i>KRAS</i>      | CCDS8702.1,CCDS8703.1  | L19F   | Y                    |
| BPDCN_CAL-1 | 99          | C/G     | <i>KRAS</i>      | CCDS8702.1,CCDS8703.1  | G12A   | Y                    |
| BPDCN_43    | 34          | C/G     | <i>NRAS</i>      | CCDS877.1              | G12A   | Y                    |
| BPDCN_41    | 32          | C/T     | <i>NRAS</i>      | CCDS877.1              | G12S   | Y                    |
| BPDCN_23    | 38          | C/G     | <i>BRAF</i>      | CCDS5863.1             | G469A  | Y                    |
| BPDCN_46    | 25          | C/A     | <i>BRAF</i>      | CCDS5863.1             | G464V  | N                    |
| BPDCN_39    | 42          | C/T     | <i>SUZ12</i>     | CCDS11270.1            | R654*  | Y                    |
| BPDCN_50    | 42          | C/T     | <i>TNFRSF13B</i> | CCDS11181.1            | R122Q  | Y                    |
| BPDCN_25    | 90          | C/G     | <i>ZRSR2</i>     | CCDS14172.1            | Y373*  | Y                    |
| BPDCN_25    | 40          | C/T     | <i>IDH2</i>      | CCDS10359.1            | R140Q  | Y                    |

**Table S8. Top 10 biological processes emerged from gene functional analysis of WES data**

| Term                                       | Description                                        | Count | P-value     | FDR         | Fold Enrich. |
|--------------------------------------------|----------------------------------------------------|-------|-------------|-------------|--------------|
| <b>EPIGENETIC PROCESS</b>                  |                                                    |       |             |             |              |
| GO:0016569                                 | covalent chromatin modification                    | 8     | 0.000101184 | 0.333669805 | 5.362358277  |
| GO:0006325                                 | chromatin organization                             | 9     | 0.000117091 | 0.333669805 | 4.586177715  |
| GO:0048096                                 | chromatin-mediated maintenance of transcription    | 2     | 0.000332385 | 0.473593505 | 72.25777778  |
| GO:0045815                                 | positive regulation of gene expression, epigenetic | 3     | 0.000470088 | 0.519119857 | 19.70666667  |
| <b>HEMATOPOIETIC STEM CELL HOMEOSTASIS</b> |                                                    |       |             |             |              |
| GO:0061484                                 | hematopoietic stem cell homeostasis                | 2     | 0.000111579 | 0.333669805 | 120.4296296  |
| GO:0042592                                 | homeostatic process                                | 13    | 0.000284612 | 0.473593505 | 2.928151843  |
| <b>RAC SIGNALING</b>                       |                                                    |       |             |             |              |
| GO:0035020                                 | regulation of Rac protein signal transduction      | 2     | 0.000485783 | 0.519119857 | 60.21481481  |
| <b>GABA SECRETION</b>                      |                                                    |       |             |             |              |
| GO:0014051                                 | gamma-aminobutyric acid secretion                  | 2     | 0.000266377 | 0.473593505 | 80.28641975  |
| GO:0015812                                 | gamma-aminobutyric acid transport                  | 2     | 0.000573097 | 0.54437804  | 55.58290598  |

**Table S9. SNVs of *ASXL1* and *TET2* genes.**

| Gene         | SNV     | DNA       | Sample   | AA     | SNV        | Position                                | COSMIC      |
|--------------|---------|-----------|----------|--------|------------|-----------------------------------------|-------------|
| <i>TET2</i>  | Somatic | Unmatched | BPDCN_41 | S657+  | frameshift | before interaction with DNA domain      | //          |
|              | Somatic | Unmatched | BPDCN_42 | Q770*  | nonsense   | before interaction with DNA domain      | //          |
|              | Somatic | Matched   | BPDCN_43 | Q1084+ | frameshift | before interaction with DNA domain      | //          |
|              | Somatic | Unmatched | BPDCN_42 | Q1466* | nonsense   | before interaction with DNA domain      | //          |
| <i>ASXL1</i> | Somatic | Unmatched | BPDCN_25 | G642+  | frameshift | inside interaction with NCOA1 domain    | COSM G642*  |
|              | Somatic | Matched   | BPDCN_38 | G710*  | nonsense   | before domain for interaction with RARA | COSM1283534 |
|              | Somatic | Matched   | BPDCN_39 | L775*  | nonsense   | before domain for interaction with RARA | COSM52930   |
|              | Somatic | Matched   | BPDCN_49 | R965*  | nonsense   | before domain for interaction with RARA | COSM132978  |

**Table S10. Twenty-five epigenetic modifier genes mutated in BPDCN.**

| Case        | chr:pos        | ref/var | Gene            | AA     | Cosmic_v66_<br>Gene | MutComFocal<br>Mut Score | Polyphen2<br>HDIV_score | Polyphen2 HVAR_score | SIFT_score |
|-------------|----------------|---------|-----------------|--------|---------------------|--------------------------|-------------------------|----------------------|------------|
| BPDCN_45    | chr1:27106539  | G/A     | <i>ARID1A</i>   | W1833* | 790                 | 1.66E-05                 | . .                     | . .                  | . 1        |
| BPDCN_23    | chr1:155448058 | G/A     | <i>ASHIL</i>    | R1535C | 273                 | 5.00E-07                 | 1.0;1.0                 | 0.99;0.996           | 0          |
| BPDCN_25    | chr20:31022441 | -/G     | <i>ASXL1</i>    | G642+  | 849                 | 5.43E-04                 | .                       | .                    | 0.15       |
| BPDCN_38    | chr20:31022643 | G/T     | <i>ASXL1</i>    | G710*  | 849                 | 5.43E-04                 | .                       | .                    | 1          |
| BPDCN_39    | chr20:31022839 | T/A     | <i>ASXL1</i>    | L775*  | 849                 | 5.43E-04                 | .                       | .                    | 0.67       |
| BPDCN_49    | chr20:31023408 | C/T     | <i>ASXL1</i>    | R965*  | 849                 | 5.43E-04                 | 0.009;0.009             | 0.005;0.005          | 0.45       |
| BPDCN_47    | chr20:31023472 | A/G     | <i>ASXL1</i>    | N986S  | 849                 | 5.43E-04                 | 0.208                   | 0.029                | 0.13       |
| BPDCN_46    | chr18:31323569 | C/T     | <i>ASXL3</i>    | P1253S | 131                 | 1.15E-06                 | 0.999                   | 0.988                | 0          |
| BPDCN_50    | chr14:21854308 | G/A     | <i>CHD8</i>     | R2125W | 205                 | 5.87E-06                 | 0.004                   | 0.003                | 0.71       |
| BPDCN_23    | chr14:21861393 | G/A     | <i>CHD8</i>     | L1835F | 205                 | 5.87E-06                 | 0.999;0.999 .           | 0.997;0.995 .        | 0.02 .     |
| BPDCN_CAL-1 | chr14:21873903 | C/T     | <i>CHD8</i>     | G731R  | 205                 | 5.87E-06                 | .                       | .                    | 1          |
| BPDCN_CAL-1 | chr4:144457820 | T/G     | <i>SMARCA5</i>  | L495*  | 72                  | 3.68E-07                 | 0.028;0.021             | 0.004;0.009          | 0.43       |
| BPDCN_CAL-1 | chr4:95173830  | A/C     | <i>SMARCAD1</i> | N318T  | 92                  | 5.64E-07                 | .                       | .                    | 0.2        |
| BPDCN_25    | chr12:50492757 | C/T     | <i>SMARCD1</i>  | Q508*  | 35                  | 1.60E-06                 | .                       | .                    | 1          |
| BPDCN_39    | chr17:30325762 | C/T     | <i>SUZ12</i>    | R654*  | 54                  | 5.58E-05                 | 0.286;0.165;0.009       | 0.055;0.02;0.003     | 0.21       |
| BPDCN_CAL-1 | chr3:4345101   | A/G     | <i>SETMAR</i>   | E16G   | 30                  | 1.34E-06                 | 0.988;0.979             | 0.794;0.628          | 0.09       |
| BPDCN_42    | chr16:30732644 | C/T     | <i>SRCAP</i>    | P1130S | 275                 | 6.08E-07                 | 2.90E-04                | .                    | 0.34       |
| BPDCN_41    | chr4:106157069 | -/A     | <i>TET2</i>     | S657+  | 929                 | 2.90E-04                 | .                       | .                    | 1          |
| BPDCN_42    | chr4:106157407 | C/T     | <i>TET2</i>     | Q770*  | 929                 | 2.90E-04                 | .                       | .                    | 0.25       |
| BPDCN_38    | chr4:106158108 | G/A     | <i>TET2</i>     | W1003* | 929                 | 2.90E-04                 | .                       | .                    | 1          |
| BPDCN_43    | chr4:106158349 | -/A     | <i>TET2</i>     | Q1084+ | 929                 | 2.90E-04                 | .                       | .                    | 1          |
| BPDCN_42    | chr4:106193934 | C/T     | <i>TET2</i>     | Q1466* | 929                 | 2.90E-04                 | .                       | .                    | 0.25       |
| BPDCN_37    | chr4:106196213 | C/T     | <i>TET2</i>     | R1516* | 929                 | 2.90E-04                 | 1                       | 0.998                | 0          |
| BPDCN_25    | chr15:90631934 | C/T     | <i>IDH2</i>     | R140Q  | 607                 | 3.04E-06                 | 1                       | 1                    | 0          |
| BPDCN_47    | chr12:49448165 | C/G     | <i>MLL2</i>     | W145C  | 600                 | 1.51E-05                 | 1                       | 1                    | 0          |
| BPDCN_41    | chr7:151843784 | A/C     | <i>MLL3</i>     | V4644G | 774                 | 1.51E-06                 | . 0.993;0.804;0.902     | . 0.907;0.342;0.415  | 0.02 0.01  |

|             |                 |     |              |        |     |          |                               |                               |      |
|-------------|-----------------|-----|--------------|--------|-----|----------|-------------------------------|-------------------------------|------|
| BPDCN_CAL-1 | chr19:36216708  | C/T | <i>MLL4</i>  | R1292W | 223 | 1.07E-06 | 1                             | 0.981                         | 0    |
| BPDCN_50    | chr11:94731791  | C/T | <i>KDM4D</i> | R419W  | 54  | 2.46E-06 | 0.002                         | 0.001                         | 0.01 |
| BPDCN_46    | chr9:96429387   | C/T | <i>PHF2</i>  | S738L  | 105 | 1.64E-06 | 0.064;0.002                   | 0.005;0.001                   | 0.21 |
| BPDCN_CAL-1 | chr12:9085218   | C/T | <i>PHC1</i>  | Q389*  | 65  | 5.63E-07 | .                             | .                             | 0.15 |
| BPDCN_CAL-1 | chr1:33836638   | C/A | <i>PHC2</i>  | A131S  | 72  | 7.53E-07 | 0.009;0.009;0.049             | 0.014;0.006;0.012             | 1    |
| BPDCN_41    | chr22:41573648  | G/C | <i>EP300</i> | G1978A | 326 | 9.51E-07 | 0.734                         | 0.196                         | 0.46 |
| BPDCN_CAL-1 | chr12:132445627 | C/T | <i>EP400</i> | P155S  | 346 | 4.73E-07 | 0.196;0.121;0.196;0.245;0.036 | 0.044;0.044;0.044;0.094;0.028 | 0.16 |
| BPDCN_CAL-1 | chr12:132471135 | C/A | <i>EP400</i> | S668Y  | 346 | 4.73E-07 | 0.631;0.631;0.631;0.98;0.753  | 0.329;0.329;0.329;0.851;0.329 | 0.05 |
| BPDCN_46    | chr20:45618703  | T/A | <i>EYA2</i>  | D18E   | 71  | 1.12E-05 | 0.0;0.0;0.0;0.0               | 0.001;0.001;0.001;0.001       | 0.8  |
| BPDCN_42    | chr20:45702876  | C/T | <i>EYA2</i>  | P188L  | 71  | 1.12E-05 | 0.996;0.846;0.875;0.875       | 0.797;0.131;0.173;0.173       | 0.02 |
| BPDCN_41    | chr8:41789947   | T/C | <i>MYST3</i> | M1931V | 193 | 4.16E-06 | 0.969                         | 0.914                         | 0.15 |
| BPDCN_23    | chr10:76784746  | C/T | <i>MYST4</i> | R1135C | 209 | 2.84E-06 | 1.0;1.0;1.0                   | 0.997;0.998;0.988             | 0    |



**Table S11. Top 10 significant biological process emerged by Gene Ontology analysis of 86 up-regulated genes marked by H3K27-promoter acetylation**

| Term       | Description                            | Count | P-Value              | Fold Enrichment | FDR                  |
|------------|----------------------------------------|-------|----------------------|-----------------|----------------------|
| GO:0007067 | mitotic nuclear division               | 15    | 3.69034691694026e-10 | 8.027320606     | 3.15487757929223e-06 |
| GO:0007059 | chromosome segregation                 | 13    | 1.26807986333688e-09 | 9.177333912     | 3.71276365696005e-06 |
| GO:0051783 | regulation of nuclear division         | 10    | 1.63092095384343e-09 | 14.42590949     | 3.71276365696005e-06 |
| GO:0000819 | sister chromatid segregation           | 11    | 1.8299290971413e-09  | 11.88292359     | 3.71276365696005e-06 |
| GO:0098813 | nuclear chromosome segregation         | 12    | 2.55158560946711e-09 | 9.883282675     | 3.71276365696005e-06 |
| GO:0000278 | mitotic cell cycle                     | 20    | 2.60575294674936e-09 | 4.778953557     | 3.71276365696005e-06 |
| GO:0000070 | mitotic sister chromatid segregation   | 9     | 5.32755506377214e-09 | 15.71664876     | 6.50646689145543e-06 |
| GO:0007088 | regulation of mitotic nuclear division | 9     | 6.9189063367503e-09  | 15.25776851     | 7.39371628410979e-06 |
| GO:0051301 | cell division                          | 15    | 1.00188266571877e-08 | 6.299922501     | 9.0508192280403e-06  |
| GO:0022402 | cell cycle process                     | 22    | 1.05869917277346e-08 | 3.967125111     | 9.0508192280403e-06  |

# Supplemental Figures

**Figure S1. Sanger Sequencing validation experiments.** Representative chromatograms of matched tumor DNA samples and germline DNA of saliva samples showing somatic mutations in exon 13 and exon 16 of *ASXL1* and *SUZ12* of two patients, respectively. Mutations were detected in both strands of tumor DNA and absent from germline DNA.

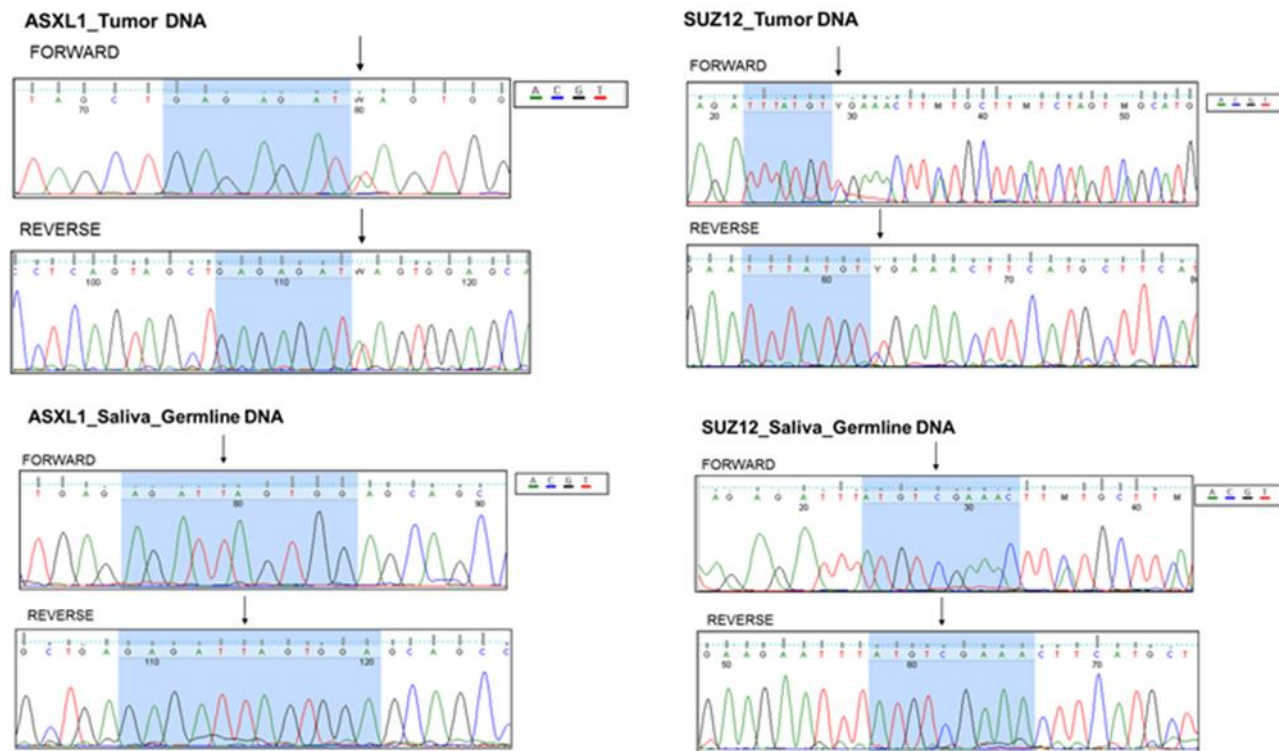

**Figure S2 - Chromosome 9 copy ratio heatmap.** Blu color represents chromosome segment loss (homozygous deletion is darker than single-copy loss). Red color represents chromosome segment gain. Values of this heatmap are the ratios between each tumor sample segment with respect to the corresponding normal reference segment. (BPDCN\_01\_U represent the CAL-1 tumor cell line). Therefore, a lower ratio (negative number) means that the tumor sample segment is less represented with respect to the corresponding normal reference segment.

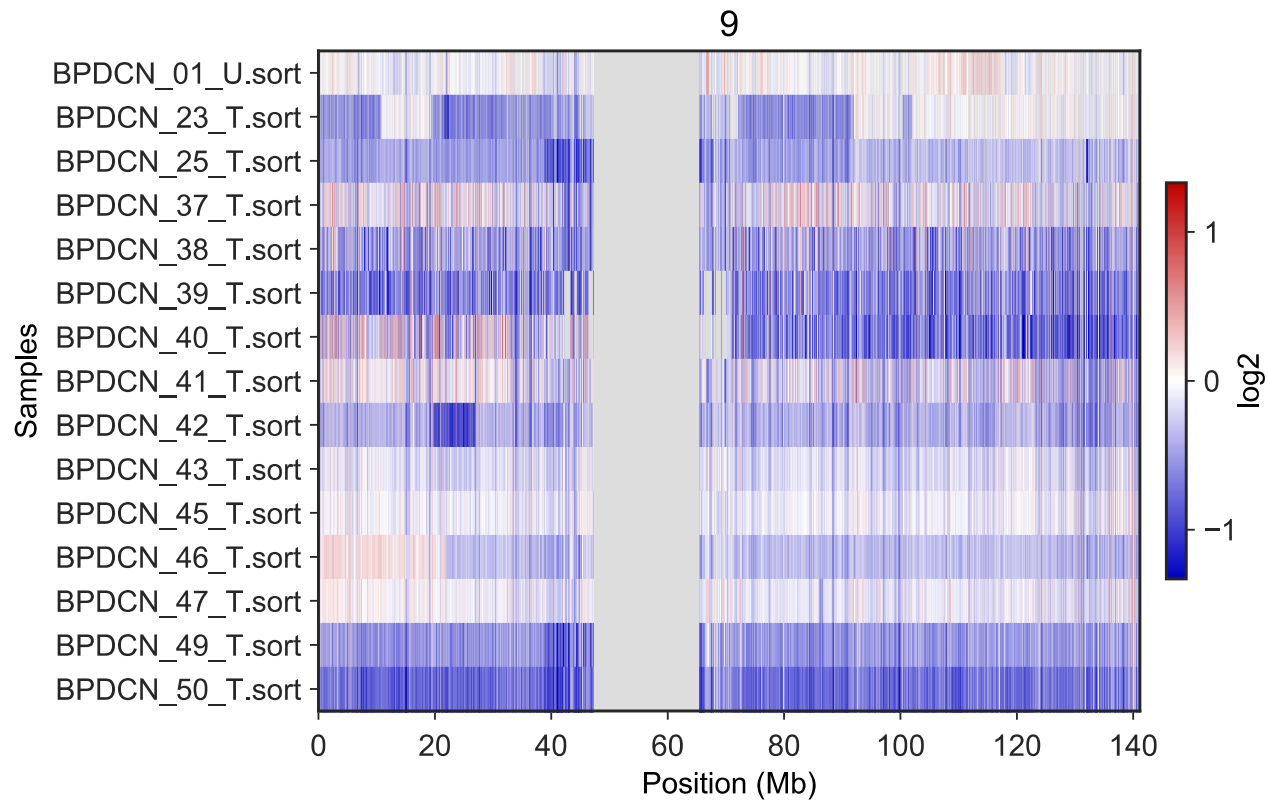

**Figure S3. Copy number variants of 9 recurrently mutated genes ( $\geq 3$  BPDCN samples).** Each row represents a gene and each column a BPDCN sample.

| Gene  | 37     | 38     | 39     | 23     | 25     | 41     | 42     | 43     | 46     | 49     | 50     | 47   | 40   | 45 | CAL1   | SNV           |      |
|-------|--------|--------|--------|--------|--------|--------|--------|--------|--------|--------|--------|------|------|----|--------|---------------|------|
| ASXL1 |        | Orange | Orange |        | Orange | Blue   |        |        |        | Orange |        |      |      |    |        | CNV, deletion | Blue |
| CHD8  |        |        |        | Orange |        | Blue   |        |        |        |        | Orange |      |      |    | Orange |               |      |
| FLNB  |        |        |        | Orange | Orange |        |        |        |        |        |        |      | Blue |    | Orange |               |      |
| KRAS  | Orange |        |        | Blue   |        |        | Orange |        |        |        |        | Blue |      |    | Orange |               |      |
| LRP2  |        |        |        |        |        | Orange | Orange |        | Orange |        |        |      |      |    |        |               |      |
| MAP1B |        |        |        |        |        |        |        |        | Orange | Orange |        |      |      |    | Orange |               |      |
| NRAS  |        |        |        |        |        | Orange |        | Orange | Orange |        |        |      |      |    |        |               |      |
| RYR1  | Blue   |        | Blue   | Orange | Orange | Blue   | Blue   |        | Orange |        |        |      |      |    |        |               |      |
| TET2  |        |        |        |        | Blue   | Orange | Orange | Orange |        |        |        |      |      |    |        |               |      |

**Figure S4 Gene Set Enrichment Analysis (GSEA) in BPDCNs extension set .** Representative plots illustrate, in BPDCN patients the enrichment of the same gene signatures recognized also in BPDCN discovery set: the *KDM5B* and *PRMT5* gene signatures reported in literature<sup>14,15</sup> and also the enrichment of a set of genes, described by Missiaglia *et al*<sup>16</sup> as responsive to a hypomethylating treatment, namely the Decitabine. NES normalized enrichment score  $\geq 1.8$  ; FDR q-val. false discovery rate  $\leq 0.02$

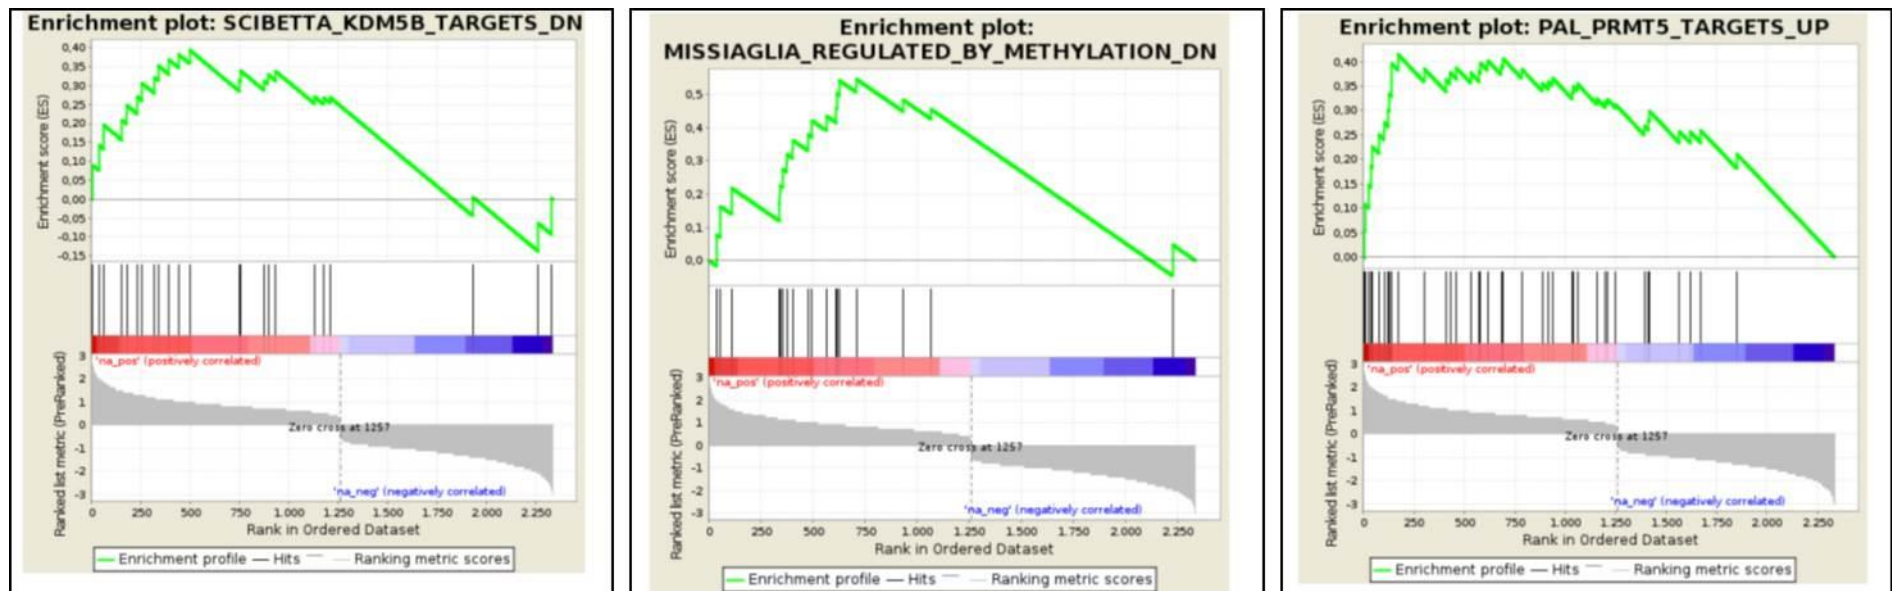

**Figure S5. Gene Set Enrichment Analysis (GSEA) in CAL-1 cell line.** Representative plots illustrate. in CAL-1 the enrichment of the same gene signatures recognized also in BPDCN samples: the *KDM5B* and *PRMT5* gene signatures reported in literature<sup>14,15</sup> and also the enrichment of a set of genes. described by Missiaglia<sup>16</sup> et al as responsive to a hypomethylating treatment. namely the Decitabine. NES normalized enrichment score  $\geq 1.8$ ; FDR q-val. false discovery rate  $\leq 0.06$

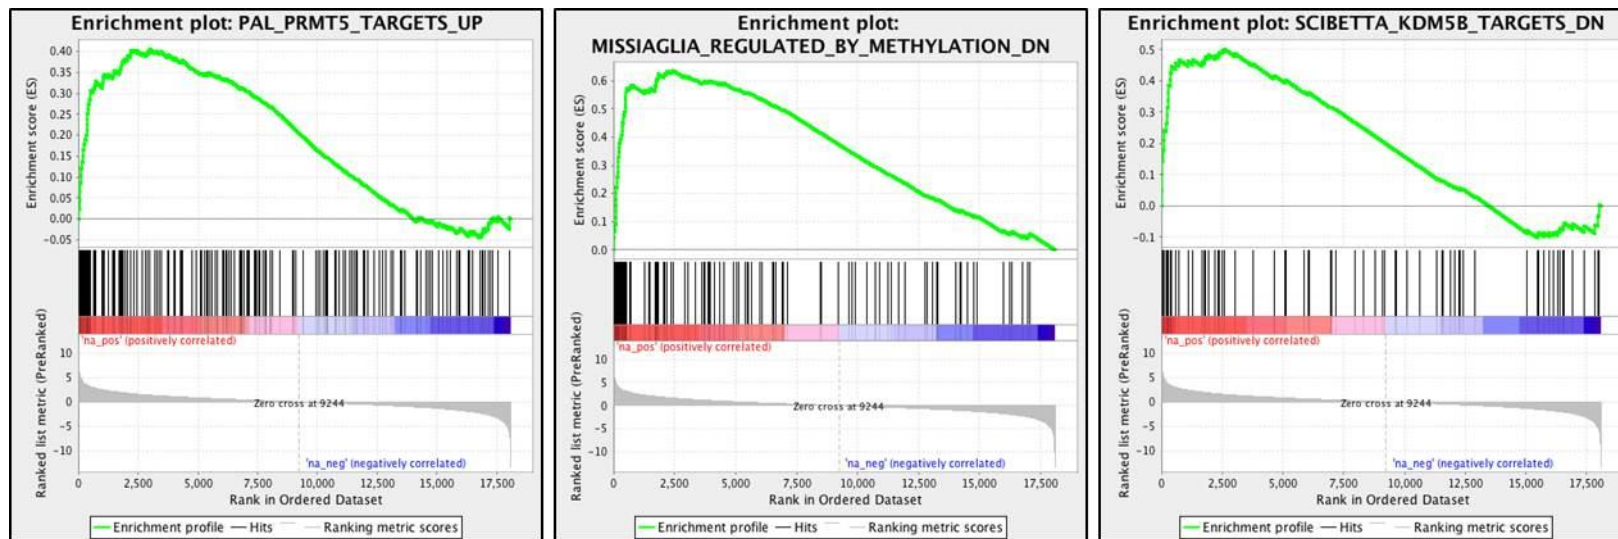

## Supplemental References

1. Facchetti F, Petrella T, Pileri SA: Blastic plasmacytoid dendritic cell neoplasm. WHO Classification of Tumours of Haematopoietic and Lymphoid Tissues. Revised 4th Edition. Swerdlow SH, Campo E, Harris NL, Jaffe ES, Pileri SA, Stein H, Thiele J, Editors. IARC Press; Lyon, France: 2008. pp. 145–147.28.
2. Fanelli M, Amatori S, Barozzi I, et al. Pathology tissue-chromatin immunoprecipitation, coupled with high-throughput sequencing, allows the epigenetic profiling of patient samples. *Proceedings of the National Academy of Sciences*. 2010;107(50):21535-21540
3. Talevich E, Shain AH, Botton T, Bastian BC. CNVkit: Genome-Wide Copy Number Detection and Visualization from Targeted DNA Sequencing. *PLoS Comput Biol*. 2016; 21;12(4).
4. Li H, Handsaker B, Wysoker A, et al. The Sequence Alignment/Map format and SAMtools. *Bioinformatics* 2009;25(16):2078–2079.
5. Li H, Durbin R. Fast and accurate short read alignment with Burrows-Wheeler transform. *Bioinformatics*. 2009;25(14):1754-1760.

6. Trifonov V, Pasqualucci L, Tiacci E, Falini B, Rabadan R. SAVI: a statistical algorithm for variant frequency identification. *BMC Systems Biology*. 2013;7(Suppl 2):S2.
7. Wang J, Vasaikar S, Shi Z, Greer M, Zhang B. WebGestalt 2017: a more comprehensive, powerful, flexible and interactive gene set enrichment analysis toolkit. *Nucleic Acids Research*. 2017;45(W1):W130-W137.
8. Dobin A, Davis C, Schlesinger F et al. STAR: ultrafast universal RNA-seq aligner. *Bioinformatics*. 2013;29(1):15-21.
9. Anders S, Huber W: Differential expression analysis for sequence count data. *Genome Biol*. 2010; 11:R106.
10. Subramanian A, Tamayo P, Mootha V et al. Gene set enrichment analysis: A knowledge-based approach for interpreting genome-wide expression profiles. *Proceedings of the National Academy of Sciences*. 2005;102(43):15545-15550.
11. Zhang Y, Liu T, Meyer CA, et al. Model-based analysis of ChIP-Seq (MACS). *Genome Biol* 2008;9(9):R137.
12. Ye T, Krebs A, Choukrallah M et al. seqMINER: an integrated ChIP-seq data interpretation platform. *Nucleic Acids Research*. 2011;39(6):e35-e35.
13. Agliano A, Martin-Padura I, Marighetti P, et al. Therapeutic effect of lenalidomide in a novel xenograft mouse model of human blastic NK cell lymphoma/blastic plasmacytoid dendritic cell neoplasm. *Clinical Cancer Research*. 2011;17(19):6163-6173.



14. Scibetta AG, Santangelo S, Coleman J, Hall D, Chaplin T, Copier J, et al. Functional analysis of the transcription repressor PLU-1/JARID1B. *Molecular and Cellular Biology*. 2007;27(20):7220-7235
15. Pal S, Vishwanath SN, Erdjument-Bromage H, Tempst P, Sif S. Human SWI/SNF-associated PRMT5 methylates histone H3 arginine 8 and negatively regulates expression of ST7 and NM23 tumor suppressor genes. *Molecular and Cellular Biology*. 2004;24(21):9630-9645.
16. Missiaglia E, Donadelli M, Palmieri M, Crnogorac-Jurcevic T, Scarpa A, Lemoine NR. Growth delay of human pancreatic cancer cells by methylase inhibitor 5-aza-2'-deoxycytidine treatment is associated with activation of the interferon signalling pathway. *Oncogene*. 2005;24(1):199-211
