# Supplementary material for: Blastic plasmacytoid dendritic cell neoplasm: genomics mark epigenetic dysregulation as a primary therapeutic target
Source: PubMed Central journal article supplement — Haematologica. 2018 Oct 31;104(4):729–37. doi: 10.3324/haematol.2018.202093 (PMC6442957; doi:10.3324/haematol.2018.202093), 2019-04
Supplement: 2018_202093-Disclosures_and_Contributions.pdf [file 2018_202093-Disclosures_and_Contributions.pdf]

Haematologica  
HAEMATOL/2018/202093  
Version 3

Blastic plasmacytoid dendritic cell neoplasm: genomics mark epigenetic dysregulation as a primary therapeutic target

Maria Rosaria Sapienza, Francesco Abate, Federica Melle, Stefania Orecchioni, Fabio Fuligni, Maryam Etebari, Valentina Tabanelli, Maria Antonella Laginestra, Alessandro Pileri, Giovanna Motta, Maura Rossi, Claudio Agostinelli, Elena Sabattini, Nicola Pimpinelli, Mauro Truni, Brunangelo Falini, Lorenzo Cerroni, Giovanna Talarico, Rossana Piccioni, Stefano Amente, Valentina Indio, Giuseppe Tarantino, Francesco Brundu, Marco Paulli, Emilio Berti, Fabio Facchetti, Gaetano Ivan Dellino, Francesco Bertolini, Claudio Tripodo, Raul Rabadan, and Stefano A. Pileri

Disclosures: None

Contributions: MRS collected the samples, manually worked at WES, RNAseq and Sanger sequencing experiments, contributed to data interpretation and to the writing of the article; FA and FB performed the bioinformatics analysis of WES, Miseq and RNAseq data and contributed to the writing of the article; FM collected the samples, manually worked at MiSeq experiments and contributed to data interpretation; FF performed the bioinformatics analysis of WES and RNAseq data; ME manually worked at MiSeq experiments; MAL, MR and GM contributed to data interpretation; VT, CA and ES worked at immunohistochemistry evaluation of BPDCN biopsies; AP, EB, FF, MT, NP, MP and BF provided biological material; SO and GT worked at mouse model experiments; FB supervised the mouse model experiments; RP performed the Pat-ChiP sequencing experiments; SA performed the bioinformatics analysis of Pat-ChiP sequencing data; GID supervised the Pat-ChiP sequencing experiments and analysis; RR supervised the bioinformatics analysis of WES, Miseq and RNAseq data and critically revised the article; SAP formulated the study design, supervised the data interpretation and critically revised the article.
